# Supplementary material
Source: Research Square preprint supplement (doi:10.21203/rs.3.rs-9927237/v1)
Supplement: Supplementary file 1 [file 813d04623f94c252bf8e4142.docx]

# Sustained Cognitive Activation and Recreational Deprivation among Urban Working Indian Women: A Cross-Sectional Study

**Mental Hyperactivity**

1. My thoughts race and I find it hard to slow them down.
2. I often overthink even small situations.
3. I feel stuck in cycles of over-analysis and get paralyzed mentally.
4. My mind rarely feels relaxed, even during breaks.
5. I experience persistent worry about daily tasks or the future.
6. I have difficulty falling or staying asleep.
7. I sleep excessively often then and now as a way to escape stress.
8. I often feel physically restless
9. I get agitated often both at home and at work place.
10. I struggle to focus or concentrate on tasks.
11. I experience intrusive, unwanted thoughts.
12. I loose my patience and deeply affected or irritated by even small hurtful comments from others.
13. I get frustrated quickly, even at minor things.
14. I feel emotionally drained or burnt out when I reflect on my personal problems..
15. I experience frequent tension in my neck, jaw, or shoulders.
16. I bite nails, pull hair, or fidget during stress.
17. I depend on emotional eating or drinking addiction (Food, caffeine etc..) to feel mentally stable.
18. I use screens excessively to calm my mind or to divert my mind.
19. I talk rapidly or interrupt during conversations.
20. Due to my work-life responsibilities, I feel disconnected from recreational activities that bring me joy which I once enjoyed.
21. I struggle to prioritize my daily responsibilities.
22. I get stuck in repetitive or looping thoughts.
23. I find it hard to make clear decisions.
24. I am mentally inflexible when plans change.
25. I experience sudden mood swings or irritability.
26. I feel emotionally detached or disconnected from others.
27. I often feel guilty or ashamed about not doing enough.
28. I no longer enjoy activities I once loved.
29. I avoid responsibilities or situations that overwhelm me.
30. I multitask excessively but complete little.
31. I plan excessively but struggle to execute plans.
32. I feel a tightness in my chest,stomach or shallow breathing when stressed.
33. I grind my teeth or clench my jaw during the day or night.
34. I experience butterflies, nausea, or digestive issues during stress.
35. I have irregular menstrual cycles or PMS symptoms linked to stress.
36. I often go into blank state of mind where if I hear good or bad news but feel nothing — no reaction, no emotional response making my mind get tired.
37. I feel guilty when I take breaks or rest.
38. I am unable to mentally "switch off" after work.
39. I struggle to maintain a healthy work-life balance.
40. I’ve noticed a decline in my social interactions.
41. I feel a loss in my recreational, leisure, fun, extra curricular activities which I done before but now discontinued or stopped now because of work-life responsibilities.
42. I increasingly rely on others for emotional support or motivation.
43. I use passive escapes (like binge-watching or scrolling) instead of active relaxation.
44. I feel repetitive forward-backward movement in the body while working or while thinking.
45. I often lament,mourn,complains,blabbers more about my tasks,problems and about unsatisfactory work life.

**Female Recreational Deficit**

1. I rarely have time in my schedule for any form of recreational activity.
2. My daily responsibilities leave me too exhausted to engage in anything fun or recreational.
3. I prioritize work and family over my own recreation.
4. I feel that taking breaks for recreation is a luxury I cannot afford.
5. Even when I have time, I don’t choose to relax or enjoy recreational activities.
6. I feel guilty when I do something recreational for myself.
7. I find it hard to relax, even during downtime.
8. I worry that others may see me as unproductive when I spend time on leisure.
9. I constantly think about pending tasks, even when I try to rest.
10. I struggle to enjoy recreational activities because my mind stays occupied with responsibilities.
11. In my culture or family, women are expected to always stay productive instead of enjoying recreation.
12. I was conditioned in my youth to focus on achievements more than recreation.
13. I feel judged by others when I take time for myself.
14. Society expects working women to be “always on” and available, rather than prioritizing personal time.
15. Taking breaks feels difficult because I feel the need to constantly prove I’m doing enough.
16. I have difficulty identifying what I truly enjoy doing for leisure.
17. With work and responsibilities, I’ve lost touch with what I enjoy recreational.
18. I cannot remember the last time I did something purely for rejuvenation.
19. I often don’t sacrifice time for recreational activities because of work or family responsibilities.
20. I often say “I don’t have any recreation” when asked.
21. I feel a growing disconnection from the creative or enjoyable activities that once I used for refreshment.
22. My body shows signs of stress (e.g., headaches, migraine, fatigue, restlessness, body pain, sleep disturbances) due to lack of rest.
23. I believe that lack of recreation has negatively impacted my well-being.
24. I feel emotionally distant or irritable because I don’t get time for myself.
25. I check work messages or emails during personal or recreational time.
26. I skip breaks or vacations due to workload or expectations.
27. I often multitask even during recreational time (e.g., working while eating or watching TV).
28. I rarely spend quality alone time without responsibilities or distractions.
29. I struggle to create boundaries between work and personal life.
30. I have not incorporated recreational activities in my daily routine due to work-life imbalance and that affects my mental health.
